# Supplementary material
Source: MDPI journal article supplement (https://www.mdpi.com/1424-2818/15/3/367)
Supplement: s1 [file s1]

## SUPPORTING INFORMATION

### Phylogeographic and morphological analysis of *Botrylloides niger* Herdman, 1886 from the northeastern Mediterranean Sea

Berivan Temiz, Esra Öztürk, Simon Blanchoud, Arzu Karahan

#### Supporting Tables

**Table S1. Details of sampling stations.**

| Region         | Station   | Date       | Coordinates                     | Salinity (ppt) | pH  |
|----------------|-----------|------------|---------------------------------|----------------|-----|
| <b>Antalya</b> | Kemer     | 25/10/2018 | 36°35'-59.55"-N 30°34'-30.66"-E | 40.1           | 7.9 |
|                | Side      | 24/10/2018 | 36°46'-00.78"-N 31°23'-07.62"-E | 37.5           | 7.8 |
|                | Alanya    | 24/10/2018 | 36°33'-33.85"-N 31°57'-07.41"-E | 39.8           | 8.0 |
|                | Tersane   | 29/10/2018 | 36°32'-05.14"-N 31°59'-53.89"-E | -              | -   |
| <b>Mersin</b>  | Tisan     | 03/10/2018 | 36°09'-27.95"-N 33°40'-59.90"-E | 40.2           | 8.3 |
|                | Kızkalesi | 03/10/2018 | 36°27'-27.52"-N 34°08'-38.17"-E | 39-40          | ~ 8 |
|                | Mezitli   | 10/4/2018  | 36°43'-58.76"-N 34°31'-18.53"-E | 39.2           | 8.1 |
| <b>Hatay</b>   | Konacık   | 26/9/2018  | 36°21'-38.79"-N 35°49'-16.90"-E | 40.0           | 7.9 |

**Table S2. Details of samplings, observed haplotypes and genotypes.** N: sample number. <sup>a</sup>: samples used for the spatial analysis, <sup>b</sup>: samples used for the temporal analysis, \*: samples without sequences.

| Station                 | Sampling date | N                 | COI   | Observed haplotypes |     |     |
|-------------------------|---------------|-------------------|-------|---------------------|-----|-----|
|                         |               |                   |       | H3                  | 18S | 28S |
| Kemer                   | 10/2018       | 30 <sup>a</sup>   | H1    | H01,H02,H03,H13,H14 | -   | -   |
| Side                    | 10/2018       | 10 <sup>a</sup>   | H1    | H02,H11,H12         | -   | -   |
|                         | 10/2018       | 1*                | -     | -                   | -   | -   |
| Alanya                  | 04/2012       | 21 <sup>a</sup>   | H1    | -                   | -   | -   |
|                         | 04/2012       | 1*                | -     | -                   | -   | -   |
|                         | 10/2018       | 3 <sup>a</sup>    | H1    | H09,H10             | -   | -   |
| Tersane                 | 10/2018       | 3 <sup>a</sup>    | H1    | -                   | -   | -   |
| Tisan                   | 10/2018       | 14 <sup>a</sup>   | H1    | H01,H02,H03         | -   | -   |
| Kızkalesi               | 04/2012       | 5*                | -     | -                   | -   | -   |
|                         | 07/2014       | 2*                | -     | -                   | -   | -   |
|                         | 09/2014       | 16*               | -     | -                   | -   | -   |
|                         | 11/2017       | 18 <sup>b</sup>   | H1,H2 | H02,H03,H07         | H1  | H1  |
|                         | 11/2017       | 3*                | -     | -                   | -   | -   |
|                         | 07/2018       | 4 <sup>b</sup>    | H1    | -                   | H1  | -   |
|                         | 07/2018       | 2*                | -     | -                   | -   | -   |
|                         | 08/2018       | 17 <sup>b</sup>   | H1    | H02                 | -   | -   |
|                         | 09/2018       | 26 <sup>b</sup>   | H1    | H03,H08             | -   | -   |
|                         | 09/2018       | 3*                | -     | -                   | -   | -   |
|                         | 10/2018       | 38 <sup>a,b</sup> | H1,H2 | H02,H03,H05,H06     | -   | -   |
|                         | 03/2019       | 1*                | -     | -                   | -   | -   |
|                         | 04/2019       | 1*                | -     | -                   | -   | -   |
| Mezitli                 | 11/2017       | 3 <sup>a</sup>    | H1    | -                   | -   | -   |
|                         | 10/2018       | 11 <sup>a</sup>   | H1,H3 | H03,H04             | -   | -   |
| Konacık                 | 09/2018       | 5 <sup>a</sup>    | H1,H4 | H01,H02             | -   | -   |
| TOTAL samples           |               | 238               |       |                     |     |     |
| TOTAL sequenced         |               | 203               |       |                     |     |     |
| TOTAL spatial analysis  |               | 138               |       |                     |     |     |
| TOTAL temporal analysis |               | 103               |       |                     |     |     |

**Table S3. Kızkalesi station time-series samplings.** N: sample number. ‘0’ indicates that no sample could be found during that month.

| Date             | N  |
|------------------|----|
| November – 2017  | 18 |
| December -2017   | 0  |
| January – 2018   | 0  |
| February – 2018  | 0  |
| March – 2018     | 0  |
| April – 2018     | 0  |
| May – 2018       | 0  |
| June – 2018      | 0  |
| July – 2018      | 4  |
| August – 2018    | 17 |
| September – 2018 | 26 |
| October -2018    | 38 |

**Table S4. PCR programs for COI, H3, 28S rRNA and 18S rRNA genes.**

| PCR program | Denaturation | Annealing     | Extension    | Final Extension | Cycles number | Reference                      |
|-------------|--------------|---------------|--------------|-----------------|---------------|--------------------------------|
| DEGCOI      | 95°C (1 min) | 45°C (30 sec) | 72°C (1 min) | 72°C (10 min)   | 35            | Reem <i>et al.</i> , 2018 [10] |
| H3          | 95°C (1 min) | 60°C (45 sec) | 72°C (1 min) | 72°C (10 min)   | 35            | Reem <i>et al.</i> , 2018 [10] |
| 28S         | 95°C (1 min) | 62°C (45 sec) | 72°C (1 min) | 72°C (10 min)   | 35            | Reem <i>et al.</i> , 2018 [10] |
| 18S         | 95°C (1 min) | 60°C (45 sec) | 72°C (1 min) | 72°C (10 min)   | 35            | Reem <i>et al.</i> , 2018 [10] |

**Table S5. Primers used in the present study.** Differences between product size and analysed size result from the trimming of low-quality sequences following alignment.

| Primer name | Primer sequence                   | Product size | Analysed size |
|-------------|-----------------------------------|--------------|---------------|
| DEG COI F2  | 5-‘AMWAATCATAAAGATATTRGWAC’-3     | ~700 bp      | 519 bp        |
| DEG COI R2  | 5-‘ AARAARGAMGTRTTRAAATTHCGATC’-3 |              |               |
| H3 F1       | 5-‘ATGGCTCGTACCAAGCAGACVGC’-3     | ~350bp       | 280 bp        |
| H3 R1       | 5-‘ATATCCTTRGGCATRATRGTGAC’-3     |              |               |
| 28S C1      | 5-‘ACCCGCTGAATTTAAGCAT’-3         | ~950 bp      | 648 bp        |
| 28S D2      | 5-‘ TCCGTGTTTCAAGACGGG’-3         |              |               |
| 18S A       | 5-‘AACCTGGTTGATCCTGCCAGT’-3       | ~1750 bp     | 966 bp        |
| 18S B       | 5-‘GATCCTTCTGCAGGTTACCTAC’-3      |              |               |

**Table S6. Accession numbers for the GenBank reference sequences.** Label corresponds to the name used in Table 1.

| Scientific name                  | Label     | COI        | H3 | 18S | 28S |
|----------------------------------|-----------|------------|----|-----|-----|
| <i>Botryllus schlosseri</i>      | Out-group | AY600987.1 |    |     |     |
| <i>Botrylloides leachii</i>      |           | HF548553.1 |    |     |     |
| <i>Botrylloides nigrum</i>       | BN-IL     | HF548559.1 |    |     |     |
| <i>Botrylloides leachii</i>      |           | HG931921.1 |    |     |     |
| <i>Botrylloides leachii</i>      |           | KF309549.1 |    |     |     |
| <i>Botrylloides leachii</i>      |           | KF309551.1 |    |     |     |
| <i>Botrylloides leachii</i>      |           | KF309608.1 |    |     |     |
| <i>Botrylloides leachii</i>      | BL-ES     | KF309644.1 |    |     |     |
| <i>Botrylloides nigrum</i>       |           | KP254541.1 |    |     |     |
| <i>Botrylloides nigrum</i>       |           | KU711782.1 |    |     |     |
| <i>Botrylloides nigrum</i>       |           | KU711783.1 |    |     |     |
| <i>Botrylloides nigrum</i>       |           | KU711784.1 |    |     |     |
| <i>Botrylloides nigrum</i>       |           | KU711785.1 |    |     |     |
| <i>Botrylloides nigrum</i>       |           | KU711786.1 |    |     |     |
| <i>Botrylloides nigrum</i>       |           | KU711787.1 |    |     |     |
| <i>Botrylloides nigrum</i>       |           | KU711788.1 |    |     |     |
| <i>Botrylloides nigrum</i>       |           | KU711789.1 |    |     |     |
| <i>Botrylloides leachii</i>      |           | KY235400.1 |    |     |     |
| <i>Botrylloides leachii</i>      |           | KY235401.1 |    |     |     |
| <i>Botrylloides leachii</i>      |           | KY235402.1 |    |     |     |
| <i>Botrylloides leachii</i>      |           | KY235403.1 |    |     |     |
| <i>Botrylloides niger</i>        | BN-BR     | LR828514.1 |    |     |     |
| <i>Botrylloides leachii</i>      |           | LR828515.1 |    |     |     |
| <i>Botrylloides leachii</i>      |           | LR828516.1 |    |     |     |
| <i>Botrylloides leachii</i>      |           | LR828517.1 |    |     |     |
| <i>Symplegma brakenhielmi</i>    |           | LS992554.1 |    |     |     |
| <i>Botrylloides leachii</i>      | BL-IT     | MG009578.1 |    |     |     |
| <i>Botrylloides aff. leachii</i> | BL-IL     | MG009579.1 |    |     |     |
| <i>Botrylloides aff. leachii</i> |           | MG009584.1 |    |     |     |
| <i>Botrylloides aff. leachii</i> |           | MG009589.1 |    |     |     |
| <i>Botrylloides leachii</i>      |           | MG009592.1 |    |     |     |
| <i>Botrylloides aff. leachii</i> |           | MG009593.1 |    |     |     |
| <i>Botryllus schlosseri</i>      |           | MG009595.1 |    |     |     |
| <i>Botrylloides leachii</i>      | BL-FR     | MK978812.1 |    |     |     |
| <i>Botrylloides diegensis</i>    | BD-FR     | MN076483.1 |    |     |     |
| <i>Botrylloides diegensis</i>    |           | MN175978.1 |    |     |     |
| <i>Botrylloides diegensis</i>    |           | MN175979.1 |    |     |     |
| <i>Botrylloides diegensis</i>    |           | MN175980.1 |    |     |     |
| <i>Botrylloides diegensis</i>    |           | MN175981.1 |    |     |     |



| Scientific name               | Label | COI        | H3 | 18S | 28S |
|-------------------------------|-------|------------|----|-----|-----|
| <i>Botrylloides diegensis</i> |       | MN175982.1 |    |     |     |
| <i>Botrylloides diegensis</i> |       | MN175983.1 |    |     |     |
| <i>Botrylloides diegensis</i> |       | MN175984.1 |    |     |     |
| <i>Botrylloides diegensis</i> |       | MN175985.1 |    |     |     |
| <i>Botrylloides diegensis</i> |       | MN175986.1 |    |     |     |
| <i>Botrylloides diegensis</i> |       | MN175987.1 |    |     |     |
| <i>Botrylloides diegensis</i> |       | MN175988.1 |    |     |     |
| <i>Botrylloides diegensis</i> |       | MT232722.1 |    |     |     |
| <i>Botrylloides niger</i>     |       | MT232723.1 |    |     |     |
| <i>Botrylloides niger</i>     |       | MT232728.1 |    |     |     |
| <i>Botrylloides niger</i>     |       | MT637960.1 |    |     |     |
| <i>Botrylloides niger</i>     |       | MT637961.1 |    |     |     |
| <i>Botrylloides nigrum</i>    | BN-US | MW278779.1 |    |     |     |
| <i>Botrylloides niger</i>     |       | MW285094.1 |    |     |     |
| <i>Botrylloides niger</i>     |       | MW285095.1 |    |     |     |
| <i>Botrylloides diegensis</i> |       | MW579604.1 |    |     |     |
| <i>Botrylloides diegensis</i> |       | MW579605.1 |    |     |     |
| <i>Botrylloides diegensis</i> |       | MW579606.1 |    |     |     |
| <i>Botrylloides diegensis</i> |       | MW579607.1 |    |     |     |
| <i>Botrylloides diegensis</i> |       | MW579608.1 |    |     |     |
| <i>Botrylloides diegensis</i> |       | MW579609.1 |    |     |     |
| <i>Botrylloides diegensis</i> |       | MW579610.1 |    |     |     |
| <i>Botrylloides diegensis</i> |       | MW579611.1 |    |     |     |
| <i>Botrylloides diegensis</i> |       | MW579612.1 |    |     |     |
| <i>Botrylloides diegensis</i> |       | MW579613.1 |    |     |     |
| <i>Botrylloides diegensis</i> |       | MW579614.1 |    |     |     |
| <i>Botrylloides diegensis</i> |       | MW579615.1 |    |     |     |
| <i>Botrylloides diegensis</i> |       | MW579616.1 |    |     |     |
| <i>Botrylloides diegensis</i> |       | MW579617.1 |    |     |     |
| <i>Botrylloides diegensis</i> |       | MW579618.1 |    |     |     |
| <i>Botrylloides diegensis</i> |       | MW579619.1 |    |     |     |
| <i>Botrylloides diegensis</i> |       | MW579620.1 |    |     |     |
| <i>Botrylloides niger</i>     |       | MW817940.1 |    |     |     |
| <i>Botrylloides diegensis</i> |       | MW817941.1 |    |     |     |
| <i>Botrylloides diegensis</i> |       | MW817942.1 |    |     |     |
| <i>Botrylloides diegensis</i> |       | MW817943.1 |    |     |     |
| <i>Botrylloides niger</i>     | BN-US | MW858360.1 |    |     |     |
| <i>Botrylloides diegensis</i> |       | MW872270.1 |    |     |     |
| <i>Botrylloides diegensis</i> |       | MW872285.1 |    |     |     |
| <i>Botrylloides diegensis</i> |       | MZ533117.1 |    |     |     |
| <i>Botrylloides niger</i>     |       | OM866151.1 |    |     |     |
| <i>Botrylloides niger</i>     |       | OM912589.1 |    |     |     |

| Scientific name                  | Label | COI        | H3         | 18S        | 28S        |
|----------------------------------|-------|------------|------------|------------|------------|
| <i>Botrylloides niger</i>        |       | OM912590.1 |            |            |            |
| <i>Botrylloides niger</i>        |       | OM912593.1 |            |            |            |
| <i>Botrylloides niger</i>        |       | OM912594.1 |            |            |            |
| <i>Botrylloides sp.</i>          |       | ON053355.1 |            |            |            |
| <i>Botrylloides sp.</i>          |       | ON053356.1 |            |            |            |
| <i>Botrylloides diegensis</i>    |       | ON059141.1 |            |            |            |
| <i>Botrylloides diegensis</i>    |       | ON076464.1 |            |            |            |
| <i>Botrylloides diegensis</i>    |       | ON076465.1 |            |            |            |
| <i>Botrylloides diegensis</i>    |       | ON076466.1 |            |            |            |
| <i>Botrylloides diegensis</i>    |       | ON076467.1 |            |            |            |
| <i>Botrylloides diegensis</i>    |       | ON076468.1 |            |            |            |
| <i>Botrylloides diegensis</i>    |       | ON076469.1 |            |            |            |
| <i>Botrylloides cf. lentus</i>   |       | ON098245.1 |            |            |            |
| <i>Botrylloides niger</i>        |       | OP221206.1 |            |            |            |
| <i>Botrylloides leachii</i>      |       |            | MG009592.1 |            |            |
| <i>Botryllus schlosseri</i>      |       |            | MG009595.1 |            |            |
| <i>Botrylloides aff. leachii</i> |       |            |            | MG009584.1 |            |
| <i>Botrylloides aff. leachii</i> |       |            |            |            | MG009589.1 |

**Table S7. Life history of the 19 colonies cultured in the laboratory.** Life cycle corresponds to the mean duration of the blastogenic cycle, measured as the time between two takeovers.

| Colony ID | Sampling site | Sampling date | Morphotype    | Haplotype | Culture start date | Life cycle (days) | Culture end date |
|-----------|---------------|---------------|---------------|-----------|--------------------|-------------------|------------------|
| G1        | Tisan         | 03/10/2018    | cream-violet  | H1        | 03/10/2018         | 4.5               | 25/12/2018       |
| G8        | Tisan         | 03/10/2018    | orange-brown  | H1        | 03/10/2018         | 5                 | 25/12/2018       |
| G15       | Tisan         | 03/10/2018    | brown-striped | H1        | 03/10/2018         | 5                 | 26/02/2019       |
| Z1        | Kızıkalesi    | 03/08/2018    | orange        | H1        | 03/08/2018         | 6                 | 14/03/2019       |
| Z2        | Kızıkalesi    | 03/08/2018    | orange        | H1        | 03/08/2018         | 5                 | 15/02/2019       |
| Z4        | Kızıkalesi    | 03/08/2018    | cream-violet  | H1        | 03/08/2018         | 6                 | 14/03/2019       |
| Z12       | Kızıkalesi    | 03/08/2018    | red           | H1        | 03/08/2018         | 5                 | 26/02/2019       |
| R1        | Kızıkalesi    | 18/09/2018    | orange        | H1        | 18/09/2018         | 4                 | 12/02/2019       |
| R4        | Kızıkalesi    | 18/09/2018    | brown-striped | H1        | 18/09/2018         | 6                 | 16/05/2019       |
| R6        | Kızıkalesi    | 18/09/2018    | green-brown   | H1        | 18/09/2018         | 3                 | 22/04/2019       |
| R8        | Kızıkalesi    | 18/09/2018    | green-brown   | H1        | 18/09/2018         | 5                 | 16/05/2019       |
| R9        | Kızıkalesi    | 18/09/2018    | brown-striped | H1        | 18/09/2018         | 5                 | 07/12/2018       |
| R12       | Kızıkalesi    | 18/09/2018    | cream-violet  | H1        | 18/09/2018         | 4                 | 16/05/2019       |
| GK4       | Kızıkalesi    | 03/10/2018    | brown-striped | H1        | 03/10/2018         | 4                 | 14/03/2019       |
| GK7       | Kızıkalesi    | 03/10/2018    | brown-striped | H1        | 03/10/2018         | 3                 | 01/04/2019       |
| GK13      | Kızıkalesi    | 03/10/2018    | orange-brown  | H1        | 03/10/2018         | 4                 | 07/12/2018       |
| GK21      | Kızıkalesi    | 03/10/2018    | red           | H1        | 03/10/2018         | 5                 | 16/05/2019       |
| L15       | Konacık       | 26/09/2018    | white-brown   | H4        | 26/09/2018         | 5                 | 16/05/2019       |
| L18       | Konacık       | 26/09/2018    | brown-striped | H1        | 26/09/2018         | 4                 | 16/05/2019       |

**Table S8. Pairwise comparison of the genetic differentiation ( $F_{st}$ ) between the temporal populations of Kızıkalesi.** No statistical significance was measured for  $F_{st}$ . n.c.: Not calculated due to a lack of polymorphism.

| $F_{st}$ | 11/2017 | 07/2018 | 08/2018 | 09/2018 | 11/2018 |
|----------|---------|---------|---------|---------|---------|
| 11/2017  | -       | 0       | 0       | 0       | -0.037  |
| 07/2018  | -       | -       | n.c.    | n.c.    | 0       |
| 08/2018  | -       | -       | -       | n.c.    | 0       |
| 09/2018  | -       | -       | -       | -       | 0       |
| 10/2018  | -       | -       | -       | -       | -       |

**Table S9. Correspondence between sample IDs, morphotypes and the determined haplotype/genotype for COI, H3, 18S and 28S. NA: no morphotype information. -: no haplotype/genotype information.**

| Sample index | Group index | Sample ID       | Morphotype    | Markers |     |     |     |
|--------------|-------------|-----------------|---------------|---------|-----|-----|-----|
|              |             |                 |               | COI     | H3  | 18S | 28S |
| 1            | 1           | C30-Kemer_OCT18 | orange-brown  | H1      | H03 | -   | -   |
| 2            | 2           | C31-Kemer_OCT18 | green-brown   | H1      | H03 | -   | -   |
| 3            | 3           | C32-Kemer_OCT18 | green-brown   | H1      | -   | -   | -   |
| 4            | 4           | C33-Kemer_OCT18 | green-brown   | H1      | -   | -   | -   |
| 5            | 5           | C34-Kemer_OCT18 | orange-brown  | H1      | -   | -   | -   |
| 6            | 6           | C35-Kemer_OCT18 | green-brown   | H1      | H13 | -   | -   |
| 7            | 7           | C38-Kemer_OCT18 | green-brown   | H1      | H03 | -   | -   |
| 8            | 8           | C39-Kemer_OCT18 | white-brown   | H1      | -   | -   | -   |
| 9            | 9           | C40-Kemer_OCT18 | orange-brown  | H1      | H03 | -   | -   |
| 10           | 10          | C41-Kemer_OCT18 | orange-brown  | H1      | H03 | -   | -   |
| 11           | 11          | C42-Kemer_OCT18 | green-brown   | H1      | H14 | -   | -   |
| 12           | 12          | C43-Kemer_OCT18 | green-brown   | H1      | -   | -   | -   |
| 13           | 13          | C44-Kemer_OCT18 | black-white   | H1      | H02 | -   | -   |
| 14           | 14          | C45-Kemer_OCT18 | orange-brown  | H1      | -   | -   | -   |
| 15           | 15          | C46-Kemer_OCT18 | brown-striped | H1      | -   | -   | -   |
| 16           | 16          | C47-Kemer_OCT18 | red           | H1      | H03 | -   | -   |
| 17           | 17          | C48-Kemer_OCT18 | green-brown   | H1      | H02 | -   | -   |
| 18           | 18          | C49-Kemer_OCT18 | cream-green   | H1      | H02 | -   | -   |
| 19           | 19          | C50-Kemer_OCT18 | black-white   | H1      | -   | -   | -   |
| 20           | 20          | C51-Kemer_OCT18 | black-white   | H1      | -   | -   | -   |
| 21           | 21          | C52-Kemer_OCT18 | red           | H1      | -   | -   | -   |
| 22           | 22          | C54-Kemer_OCT18 | white-brown   | H1      | -   | -   | -   |
| 23           | 23          | C55-Kemer_OCT18 | orange        | H1      | H01 | -   | -   |
| 24           | 24          | C56-Kemer_OCT18 | green-brown   | H1      | -   | -   | -   |
| 25           | 25          | C58-Kemer_OCT18 | green-brown   | H1      | H03 | -   | -   |
| 26           | 26          | C59-Kemer_OCT18 | brown-striped | H1      | -   | -   | -   |
| 27           | 27          | C60-Kemer_OCT18 | brown-striped | H1      | -   | -   | -   |
| 28           | 28          | C61-Kemer_OCT18 | brown-striped | H1      | H03 | -   | -   |
| 29           | 29          | C62-Kemer_OCT18 | orange-brown  | H1      | H03 | -   | -   |
| 30           | 30          | C63-Kemer_OCT18 | brown-striped | H1      | -   | -   | -   |
| 31           | 1           | C18-Side_OCT18  | green-brown   | H1      | -   | -   | -   |

| Sample index | Group index | Sample ID            | Morphotype    | Markers |     |     |     |
|--------------|-------------|----------------------|---------------|---------|-----|-----|-----|
|              |             |                      |               | COI     | H3  | 18S | 28S |
| 32           | 2           | C19-Side_OCT18       | orange-brown  | H1      | -   | -   | -   |
| 33           | 3           | C20-Side_OCT18       | orange-brown  | H1      | H11 | -   | -   |
| 34           | 4           | C21-Side_OCT18       | white-brown   | -       | -   | -   | -   |
| 35           | 5           | C22-Side_OCT18       | white-brown   | H1      | H02 | -   | -   |
| 36           | 6           | C24-Side_OCT18       | orange-brown  | H1      | H02 | -   | -   |
| 37           | 7           | C25-Side_OCT18       | red           | H1      | H02 | -   | -   |
| 38           | 8           | C26-Side_OCT18       | green-brown   | H1      | H02 | -   | -   |
| 39           | 9           | C27-Side_OCT18       | green-brown   | H1      | H02 | -   | -   |
| 40           | 10          | C28-Side_OCT18       | orange-brown  | H1      | H12 | -   | -   |
| 41           | 11          | C29-Side_OCT18       | NA            | H1      | -   | -   | -   |
| 42           | 1           | A1_i-Alanya_APR12    | orange-brown  | H1      | -   | -   | -   |
| 43           | 2           | A3_i-Alanya_APR12    | orange-brown  | H1      | -   | -   | -   |
| 44           | 3           | A4_i-Alanya_APR12    | orange-brown  | H1      | -   | -   | -   |
| 45           | 4           | A7_i-Alanya_APR12    | orange-brown  | H1      | -   | -   | -   |
| 46           | 5           | A8_i-Alanya_APR12    | orange        | H1      | -   | -   | -   |
| 47           | 6           | A9_i-Alanya_APR12    | orange-brown  | H1      | -   | -   | -   |
| 48           | 7           | A10_i-Alanya_APR12   | orange-brown  | H1      | -   | -   | -   |
| 49           | 8           | A10_i_2-Alanya_APR12 | NA            | H1      | -   | -   | -   |
| 50           | 9           | A1-Alanya_APR12      | brown-striped | H1      | -   | -   | -   |
| 51           | 10          | A6-Alanya_APR12      | brown-striped | H1      | -   | -   | -   |
| 52           | 11          | A8-Alanya_APR12      | white-brown   | H1      | -   | -   | -   |
| 53           | 12          | A11-Alanya_APR12     | orange-brown  | H1      | -   | -   | -   |
| 54           | 13          | A12-Alanya_APR12     | brown-striped | H1      | -   | -   | -   |
| 55           | 14          | A14-Alanya_APR12     | brown-striped | H1      | -   | -   | -   |
| 56           | 15          | A15-Alanya_APR12     | brown-striped | H1      | -   | -   | -   |
| 57           | 16          | A16-Alanya_APR12     | brown-striped | H1      | -   | -   | -   |
| 58           | 17          | A20-Alanya_APR12     | cream-violet  | H1      | -   | -   | -   |
| 59           | 18          | A21-Alanya_APR12     | brown         | -       | -   | -   | -   |
| 60           | 19          | A23-Alanya_APR12     | brown-striped | H1      | -   | -   | -   |
| 61           | 20          | A24-Alanya_APR12     | brown         | H1      | -   | -   | -   |
| 62           | 21          | A25-Alanya_APR12     | brown-striped | H1      | -   | -   | -   |
| 63           | 22          | A26-Alanya_APR12     | NA            | H1      | -   | -   | -   |
| 64           | 1           | C10-Alanya_OCT18     | green-brown   | H1      | -   | -   | -   |
| 65           | 2           | C16-Alanya_OCT18     | orange-brown  | H1      | H09 | -   | -   |
| 66           | 3           | C17-Alanya_OCT18     | brown-striped | H1      | H10 | -   | -   |

| Sample index | Group index | Sample ID              | Morphotype     | Markers |     |     |     |
|--------------|-------------|------------------------|----------------|---------|-----|-----|-----|
|              |             |                        |                | COI     | H3  | 18S | 28S |
| 67           | 1           | K1-Tersane_OCT18       | green-brown    | H1      | -   | -   | -   |
| 68           | 2           | K2-Tersane_OCT18       | red            | H1      | -   | -   | -   |
| 69           | 3           | K3-Tersane_OCT18       | brown-striped  | H1      | -   | -   | -   |
| 70           | 1           | G1-Tisan_OCT18         | cream-violet   | H1      | -   | -   | -   |
| 71           | 2           | G2-Tisan_OCT18         | cream-violet   | H1      | H02 | -   | -   |
| 72           | 3           | G4-Tisan_OCT18         | cream-violet   | H1      | -   | -   | -   |
| 73           | 4           | G5-Tisan_OCT18         | green-brown    | H1      | -   | -   | -   |
| 74           | 5           | G6-Tisan_OCT18         | green-brown    | H1      | -   | -   | -   |
| 75           | 6           | G8-Tisan_OCT18         | orange-brown   | H1      | H03 | -   | -   |
| 76           | 7           | G9-Tisan_OCT18         | cream-violet   | H1      | -   | -   | -   |
| 77           | 8           | G10-Tisan_OCT18        | brown-striped  | H1      | -   | -   | -   |
| 78           | 9           | G11-Tisan_OCT18        | white-brown    | H1      | -   | -   | -   |
| 79           | 10          | G12-Tisan_OCT18        | cream-violet   | H1      | H01 | -   | -   |
| 80           | 11          | G13-Tisan_OCT18        | cream-violet   | H1      | -   | -   | -   |
| 81           | 12          | G14-Tisan_OCT18        | cream-violet   | H1      | -   | -   | -   |
| 82           | 13          | G15-Tisan_OCT18        | brown-striped  | H1      | -   | -   | -   |
| 83           | 14          | G16-Tisan_OCT18        | cream-violet   | H1      | -   | -   | -   |
| 84           | 1           | Bides1-Kizkalesi_APR12 | red-striped    | -       | -   | -   | -   |
| 85           | 2           | Bides2-Kizkalesi_APR12 | orange-brown   | -       | -   | -   | -   |
| 86           | 3           | Bides3-Kizkalesi_APR12 | brown-striped  | -       | -   | -   | -   |
| 87           | 4           | Bides4-Kizkalesi_APR12 | orange-brown   | -       | -   | -   | -   |
| 88           | 5           | Bides5-Kizkalesi_APR12 | orange-red     | -       | -   | -   | -   |
| 89           | 1           | Bides1-Kizkalesi_JUL14 | brown-striped  | -       | -   | -   | -   |
| 90           | 2           | Bides2-Kizkalesi_JUL14 | orange-brown   | -       | -   | -   | -   |
| 91           | 1           | OB1-Kizkalesi_SEP14    | orange-striped | -       | -   | -   | -   |
| 92           | 2           | OB2-Kizkalesi_SEP14    | orange         | -       | -   | -   | -   |
| 93           | 3           | OB3-Kizkalesi_SEP14    | NA             | -       | -   | -   | -   |
| 94           | 4           | OB4-Kizkalesi_SEP14    | brown          | -       | -   | -   | -   |
| 95           | 5           | OB5-Kizkalesi_SEP14    | brown-striped  | -       | -   | -   | -   |
| 96           | 6           | B_LUS1-Kizkalesi_SEP14 | brown-striped  | -       | -   | -   | -   |
| 97           | 7           | O1-Kizkalesi_SEP14     | NA             | -       | -   | -   | -   |
| 98           | 8           | O2-Kizkalesi_SEP14     | NA             | -       | -   | -   | -   |
| 99           | 9           | O3-Kizkalesi_SEP14     | NA             | -       | -   | -   | -   |
| 100          | 10          | O4-Kizkalesi_SEP14     | orange-brown   | -       | -   | -   | -   |
| 101          | 11          | O7-Kizkalesi_SEP14     | brown          | -       | -   | -   | -   |

| Sample index | Group index | Sample ID                 | Morphotype    | Markers |     |     |     |
|--------------|-------------|---------------------------|---------------|---------|-----|-----|-----|
|              |             |                           |               | COI     | H3  | 18S | 28S |
| 102          | 12          | O8-Kizkalesi_SEP14        | orange-brown  | -       | -   | -   | -   |
| 103          | 13          | O9-Kizkalesi_SEP14        | NA            | -       | -   | -   | -   |
| 104          | 14          | O10-Kizkalesi_SEP14       | NA            | -       | -   | -   | -   |
| 105          | 15          | O11-Kizkalesi_SEP14       | NA            | -       | -   | -   | -   |
| 106          | 16          | O12-Kizkalesi_SEP14       | brown-striped | -       | -   | -   | -   |
| 107          | 1           | BN1-Kizkalesi_NOV17       | brown-striped | H2      | H02 | H1  | H1  |
| 108          | 2           | BN2-Kizkalesi_NOV17       | green-brown   | H1      | -   | -   | -   |
| 109          | 3           | BN3-Kizkalesi_NOV17       | brown-striped | H1      | -   | -   | -   |
| 110          | 4           | BN4-Kizkalesi_NOV17       | cream-violet  | H1      | -   | -   | -   |
| 111          | 5           | BN5-Kizkalesi_NOV17       | brown-striped | H1      | -   | -   | -   |
| 112          | 6           | BN6-Kizkalesi_NOV17       | brown-striped | H1      | -   | -   | -   |
| 113          | 7           | BS1-Kizkalesi_NOV17       | NA            | H1      | -   | -   | -   |
| 114          | 8           | BS2-Kizkalesi_NOV17       | brown-striped | H1      | H07 | -   | -   |
| 115          | 9           | BS3-Kizkalesi_NOV17       | green-brown   | H1      | -   | -   | -   |
| 116          | 10          | BS4-Kizkalesi_NOV17       | green-brown   | H1      | -   | -   | -   |
| 117          | 11          | BS5-Kizkalesi_NOV17       | cream-violet  | H1      | -   | -   | -   |
| 118          | 12          | BS6-Kizkalesi_NOV17       | cream-violet  | H1      | -   | -   | -   |
| 119          | 13          | BS8-Kizkalesi_NOV17       | green-brown   | -       | -   | -   | -   |
| 120          | 14          | BV1-Kizkalesi_NOV17       | orange        | H1      | H03 | H1  | H1  |
| 121          | 15          | BV2-Kizkalesi_NOV17       | orange-brown  | H1      | -   | -   | -   |
| 122          | 16          | BV3-Kizkalesi_NOV17       | orange-brown  | H1      | -   | -   | -   |
| 123          | 17          | BV4-Kizkalesi_NOV17       | orange        | H1      | -   | -   | -   |
| 124          | 18          | BV5-Kizkalesi_NOV17       | orange-brown  | H1      | -   | -   | -   |
| 125          | 19          | BV6-Kizkalesi_NOV17       | orange        | -       | -   | -   | -   |
| 126          | 20          | BV7-Kizkalesi_NOV17       | orange        | -       | -   | -   | -   |
| 127          | 21          | BV8-Kizkalesi_NOV17       | orange        | H1      | -   | -   | -   |
| 128          | 1           | J18_BS1-Kizkalesi_JULY18  | green-brown   | -       | -   | -   | -   |
| 129          | 2           | J18_BS2-Kizkalesi_JULY18  | green-brown   | H1      | -   | H1  | -   |
| 130          | 3           | J18_BS7-Kizkalesi_JULY18  | green-brown   | H1      | -   | -   | -   |
| 131          | 4           | J18_BS8-Kizkalesi_JULY18  | red           | H1      | -   | -   | -   |
| 132          | 5           | J18_BS9-Kizkalesi_JULY18  | green-brown   | H1      | -   | -   | -   |
| 133          | 6           | J18_BS13-Kizkalesi_JULY18 | red           | -       | -   | -   | -   |
| 134          | 1           | Z1-Kizkalesi_AUG18        | orange        | H1      | -   | -   | -   |
| 135          | 2           | Z2-Kizkalesi_AUG18        | orange        | H1      | -   | -   | -   |
| 136          | 3           | Z3-Kizkalesi_AUG18        | red-striped   | H1      | -   | -   | -   |

| Sample index | Group index | Sample ID           | Morphotype    | Markers |     |     |     |
|--------------|-------------|---------------------|---------------|---------|-----|-----|-----|
|              |             |                     |               | COI     | H3  | 18S | 28S |
| 137          | 4           | Z4-Kizkalesi_AUG18  | cream-violet  | H1      | H02 | -   | -   |
| 138          | 5           | Z5-Kizkalesi_AUG18  | brown-striped | H1      | -   | -   | -   |
| 139          | 6           | Z6-Kizkalesi_AUG18  | orange-brown  | H1      | -   | -   | -   |
| 140          | 7           | Z8-Kizkalesi_AUG18  | orange-brown  | H1      | -   | -   | -   |
| 141          | 8           | Z9-Kizkalesi_AUG18  | red           | H1      | -   | -   | -   |
| 142          | 9           | Z10-Kizkalesi_AUG18 | brown         | H1      | -   | -   | -   |
| 143          | 10          | Z11-Kizkalesi_AUG18 | brown-striped | H1      | -   | -   | -   |
| 144          | 11          | Z12-Kizkalesi_AUG18 | red           | H1      | -   | -   | -   |
| 145          | 12          | Z14-Kizkalesi_AUG18 | brown         | H1      | -   | -   | -   |
| 146          | 13          | Z15-Kizkalesi_AUG18 | brown-striped | H1      | -   | -   | -   |
| 147          | 14          | Z16-Kizkalesi_AUG18 | green-brown   | H1      | -   | -   | -   |
| 148          | 15          | Z19-Kizkalesi_AUG18 | NA            | H1      | -   | -   | -   |
| 149          | 16          | Z20-Kizkalesi_AUG18 | brown-striped | H1      | -   | -   | -   |
| 150          | 17          | Z21-Kizkalesi_AUG18 | brown         | H1      | -   | -   | -   |
| 151          | 1           | R1-Kizkalesi_SEP18  | orange        | H1      | -   | -   | -   |
| 152          | 2           | R2-Kizkalesi_SEP18  | red           | H1      | -   | -   | -   |
| 153          | 3           | R4-Kizkalesi_SEP18  | brown-striped | H1      | H03 | -   | -   |
| 154          | 4           | R5-Kizkalesi_SEP18  | NA            | H1      | -   | -   | -   |
| 155          | 5           | R6-Kizkalesi_SEP18  | green-brown   | H1      | H08 | -   | -   |
| 156          | 6           | R7-Kizkalesi_SEP18  | brown-striped | H1      | -   | -   | -   |
| 157          | 7           | R8-Kizkalesi_SEP18  | green-brown   | H1      | H03 | -   | -   |
| 158          | 8           | R9-Kizkalesi_SEP18  | brown-striped | H1      | -   | -   | -   |
| 159          | 9           | R10-Kizkalesi_SEP18 | black-white   | H1      | -   | -   | -   |
| 160          | 10          | R11-Kizkalesi_SEP18 | green-brown   | H1      | -   | -   | -   |
| 161          | 11          | R12-Kizkalesi_SEP18 | cream-violet  | H1      | -   | -   | -   |
| 162          | 12          | R14-Kizkalesi_SEP18 | orange        | H1      | -   | -   | -   |
| 163          | 13          | R15-Kizkalesi_SEP18 | brown         | H1      | -   | -   | -   |
| 164          | 14          | R16-Kizkalesi_SEP18 | red           | H1      | -   | -   | -   |
| 165          | 15          | R18-Kizkalesi_SEP18 | red           | -       | -   | -   | -   |
| 166          | 16          | R19-Kizkalesi_SEP18 | green-brown   | -       | -   | -   | -   |
| 167          | 17          | R21-Kizkalesi_SEP18 | orange        | H1      | -   | -   | -   |
| 168          | 18          | R25-Kizkalesi_SEP18 | orange-brown  | -       | -   | -   | -   |
| 169          | 19          | R28-Kizkalesi_SEP18 | brown-striped | H1      | -   | -   | -   |
| 170          | 20          | R29-Kizkalesi_SEP18 | red           | H1      | -   | -   | -   |
| 171          | 21          | R32-Kizkalesi_SEP18 | orange        | H1      | -   | -   | -   |



| Sample index | Group index | Sample ID            | Morphotype    | Markers |     |     |     |
|--------------|-------------|----------------------|---------------|---------|-----|-----|-----|
|              |             |                      |               | COI     | H3  | 18S | 28S |
| 172          | 22          | R36-Kizkalesi_SEP18  | orange-brown  | H1      | -   | -   | -   |
| 173          | 23          | R37-Kizkalesi_SEP18  | red           | H1      | -   | -   | -   |
| 174          | 24          | R39-Kizkalesi_SEP18  | brown-striped | H1      | -   | -   | -   |
| 175          | 25          | R40-Kizkalesi_SEP18  | cream-violet  | H1      | -   | -   | -   |
| 176          | 26          | R41-Kizkalesi_SEP18  | orange        | H1      | -   | -   | -   |
| 177          | 27          | R42-Kizkalesi_SEP18  | green-brown   | H1      | -   | -   | -   |
| 178          | 28          | R43-Kizkalesi_SEP18  | brown-striped | H1      | -   | -   | -   |
| 179          | 29          | R44-Kizkalesi_SEP18  | brown-striped | H1      | -   | -   | -   |
| 180          | 1           | GK1-Kizkalesi_OCT18  | orange        | H1      | H03 | -   | -   |
| 181          | 2           | GK2-Kizkalesi_OCT18  | orange        | H1      | -   | -   | -   |
| 182          | 3           | GK3-Kizkalesi_OCT18  | brown-striped | H1      | -   | -   | -   |
| 183          | 4           | GK4-Kizkalesi_OCT18  | brown-striped | H1      | -   | -   | -   |
| 184          | 5           | GK5-Kizkalesi_OCT18  | brown-striped | H1      | H03 | -   | -   |
| 185          | 6           | GK6-Kizkalesi_OCT18  | brown-striped | H1      | H02 | -   | -   |
| 186          | 7           | GK7-Kizkalesi_OCT18  | brown-striped | H1      | H05 | -   | -   |
| 187          | 8           | GK8-Kizkalesi_OCT18  | brown         | H1      | -   | -   | -   |
| 188          | 9           | GK9-Kizkalesi_OCT18  | orange-brown  | H1      | -   | -   | -   |
| 189          | 10          | GK10-Kizkalesi_OCT18 | brown-striped | H1      | H03 | -   | -   |
| 190          | 11          | GK11-Kizkalesi_OCT18 | green-brown   | H1      | H06 | -   | -   |
| 191          | 12          | GK12-Kizkalesi_OCT18 | orange-brown  | H1      | -   | -   | -   |
| 192          | 13          | GK13-Kizkalesi_OCT18 | orange-brown  | H1      | -   | -   | -   |
| 193          | 14          | GK14-Kizkalesi_OCT18 | brown-striped | H1      | -   | -   | -   |
| 194          | 15          | GK15-Kizkalesi_OCT18 | green-brown   | H1      | -   | -   | -   |
| 195          | 16          | GK17-Kizkalesi_OCT18 | orange-brown  | H1      | -   | -   | -   |
| 196          | 17          | GK18-Kizkalesi_OCT18 | orange        | H1      | -   | -   | -   |
| 197          | 18          | GK20-Kizkalesi_OCT18 | orange        | H1      | -   | -   | -   |
| 198          | 19          | GK21-Kizkalesi_OCT18 | red           | H1      | H02 | -   | -   |
| 199          | 20          | GK22-Kizkalesi_OCT18 | NA            | H1      | -   | -   | -   |
| 200          | 21          | GK24-Kizkalesi_OCT18 | brown-striped | H1      | -   | -   | -   |
| 201          | 22          | GK25-Kizkalesi_OCT18 | orange        | H1      | -   | -   | -   |
| 202          | 23          | GK26-Kizkalesi_OCT18 | brown         | H2      | H03 | -   | -   |
| 203          | 24          | GK27-Kizkalesi_OCT18 | orange-brown  | H1      | -   | -   | -   |
| 204          | 25          | GK29-Kizkalesi_OCT18 | white-brown   | H1      | -   | -   | -   |
| 205          | 26          | GK30-Kizkalesi_OCT18 | brown         | H1      | -   | -   | -   |
| 206          | 27          | GK31-Kizkalesi_OCT18 | NA            | H1      | -   | -   | -   |

| Sample index | Group index | Sample ID            | Morphotype    | Markers |     |     |     |
|--------------|-------------|----------------------|---------------|---------|-----|-----|-----|
|              |             |                      |               | COI     | H3  | 18S | 28S |
| 207          | 28          | GK32-Kizkalesi_OCT18 | green-brown   | H1      | -   | -   | -   |
| 208          | 29          | GK33-Kizkalesi_OCT18 | orange-brown  | H1      | -   | -   | -   |
| 209          | 30          | GK35-Kizkalesi_OCT18 | NA            | H1      | -   | -   | -   |
| 210          | 31          | GK38-Kizkalesi_OCT18 | NA            | H1      | -   | -   | -   |
| 211          | 32          | GK39-Kizkalesi_OCT18 | green-brown   | H1      | -   | -   | -   |
| 212          | 33          | GK40-Kizkalesi_OCT18 | white-brown   | H1      | -   | -   | -   |
| 213          | 34          | GK41-Kizkalesi_OCT18 | orange        | H1      | -   | -   | -   |
| 214          | 35          | GK43-Kizkalesi_OCT18 | red-striped   | H1      | -   | -   | -   |
| 215          | 36          | GK44-Kizkalesi_OCT18 | NA            | H1      | -   | -   | -   |
| 216          | 37          | GK45-Kizkalesi_OCT18 | brown-striped | H1      | -   | -   | -   |
| 217          | 38          | GK46-Kizkalesi_OCT18 | brown-striped | H1      | -   | -   | -   |
| 218          | 1           | KK4-Kizkalesi_MAR19  | orange-brown  | -       | -   | -   | -   |
| 219          | 1           | KK5-Kizkalesi_APR19  | cream-violet  | -       | -   | -   | -   |
| 220          | 1           | Mz_1-Mezitli_NOV17   | orange-brown  | H1      | -   | -   | -   |
| 221          | 2           | Mz_2-Mezitli_NOV17   | orange-brown  | H1      | -   | -   | -   |
| 222          | 3           | Mz_3-Mezitli_NOV17   | red           | H1      | -   | -   | -   |
| 223          | 1           | M2_12-Mezitli_OCT18  | black-white   | H3      | -   | -   | -   |
| 224          | 2           | M2_17-Mezitli_OCT18  | black-white   | H3      | H03 | -   | -   |
| 225          | 3           | M2_6-Mezitli_OCT18   | black-white   | H1      | -   | -   | -   |
| 226          | 4           | M2_7-Mezitli_OCT18   | orange        | H1      | -   | -   | -   |
| 227          | 5           | M2_10-Mezitli_OCT18  | brown-striped | H1      | -   | -   | -   |
| 228          | 6           | M2_13-Mezitli_OCT18  | orange-brown  | H1      | H04 | -   | -   |
| 229          | 7           | M2_14-Mezitli_OCT18  | brown-striped | H1      | -   | -   | -   |
| 230          | 8           | M2_15-Mezitli_OCT18  | brown         | H1      | -   | -   | -   |
| 231          | 9           | M2_19-Mezitli_OCT18  | pink          | H1      | -   | -   | -   |
| 232          | 10          | M2_20-Mezitli_OCT18  | orange-brown  | H1      | -   | -   | -   |
| 233          | 11          | M2_22-Mezitli_OCT18  | NA            | H1      | -   | -   | -   |
| 234          | 1           | L9-Konacik_SEP18     | orange-brown  | H4      | -   | -   | -   |
| 235          | 2           | L15-Konacik_SEP18    | white-brown   | H4      | H01 | -   | -   |
| 236          | 3           | L2-Konacik_SEP18     | NA            | H1      | -   | -   | -   |

| Sample index | Group index | Sample ID         | Morphotype    | Markers |     |     |     |
|--------------|-------------|-------------------|---------------|---------|-----|-----|-----|
|              |             |                   |               | COI     | H3  | 18S | 28S |
| 237          | 4           | L17-Konacik_SEP18 | orange-brown  | H1      | -   | -   | -   |
| 238          | 5           | L18-Konacik_SEP18 | brown-striped | H1      | H02 | -   | -   |

## Supporting Figures

| A | orange-brown                                                                     | orange                                                                            | brown-striped                                                                     | orange-red                                                                        | white-brown                                                                       | green-brown                                                                       | cream-green                                                                       | red                                                                               | black-white                                                                        | pink                                                                                | cream-violet                                                                        | orange-striped                                                                      | red-striped                                                                         | brown                                                                               |
|---|----------------------------------------------------------------------------------|-----------------------------------------------------------------------------------|-----------------------------------------------------------------------------------|-----------------------------------------------------------------------------------|-----------------------------------------------------------------------------------|-----------------------------------------------------------------------------------|-----------------------------------------------------------------------------------|-----------------------------------------------------------------------------------|------------------------------------------------------------------------------------|-------------------------------------------------------------------------------------|-------------------------------------------------------------------------------------|-------------------------------------------------------------------------------------|-------------------------------------------------------------------------------------|-------------------------------------------------------------------------------------|
| B |  |  |  |  |  |  |  |  |  |  |  |  |  |  |
| C |  |  |  |  |  |  |  |  |  |  |  |  |  |  |
| D |  |  |  |  |  |  |  |  |  |  |  |  |  |  |
| E | peristomatic ring, intersiphonal bands                                           | uniform                                                                           | radial strips                                                                     | peristomatic ring, intersiphonal bands                                            | peristomatic ring, dorsal patch                                                   | dorsal patch                                                                      | partial peristomatic ring, dorsal patch                                           | uniform                                                                           | partial peristomatic ring                                                          | uniform                                                                             | peristomatic ring                                                                   | radial strips                                                                       | peristomatic ring, radial strips                                                    | uniform                                                                             |
| F | low                                                                              | low                                                                               | high                                                                              | low                                                                               | low                                                                               | high                                                                              | high                                                                              | low                                                                               | medium                                                                             | low                                                                                 | high                                                                                | medium                                                                              | medium                                                                              | low                                                                                 |
| G | brown                                                                            | orange                                                                            | brown                                                                             | red                                                                               | brown                                                                             | brown                                                                             | brown                                                                             | red                                                                               | black                                                                              | pink                                                                                | violet                                                                              | orange                                                                              | red                                                                                 | brown                                                                               |
| H | orange                                                                           | orange                                                                            | yellow                                                                            | orange                                                                            | white                                                                             | green                                                                             | cream, green                                                                      | red                                                                               | white                                                                              | pink                                                                                | cream                                                                               | red                                                                                 | brown                                                                               | brown                                                                               |
| I | solid                                                                            | solid                                                                             | dotted                                                                            | solid                                                                             | solid                                                                             | dotted                                                                            | dotted                                                                            | solid                                                                             | solid                                                                              | solid                                                                               | solid                                                                               | dotted                                                                              | dotted                                                                              | solid                                                                               |

**Figure S1. Description of the 14 morphotypes.** **A)** Morphotype name, **B)** sample image, **C)** schematic representation of a typical zooid, **D)** typical pattern of the morphotype, **E)** description of the motif, **F)** variability of the motif, **G)** color of the zooid, **H)** color of the motif and **I)** type of pigmentation.

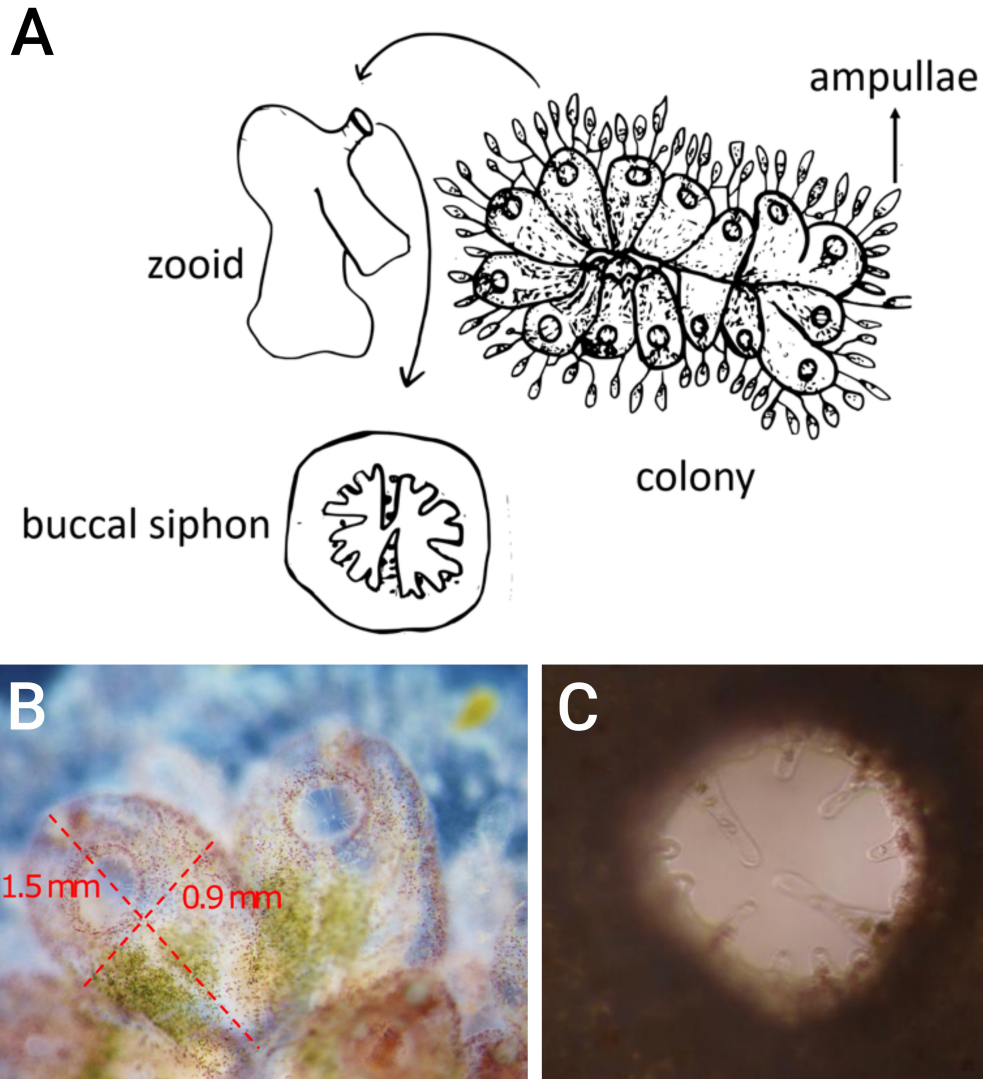

**Figure S2. Morphology of *Botrylloides niger*.** A) An illustration of *B. niger* colonial system, highlighting key anatomical features including colony, zooid, ampullae (vascular termini), and buccal siphon. B) Top view of two zooid overlaid with measurements of its size. C) Magnified picture of a buccal siphon showing its tentacles.

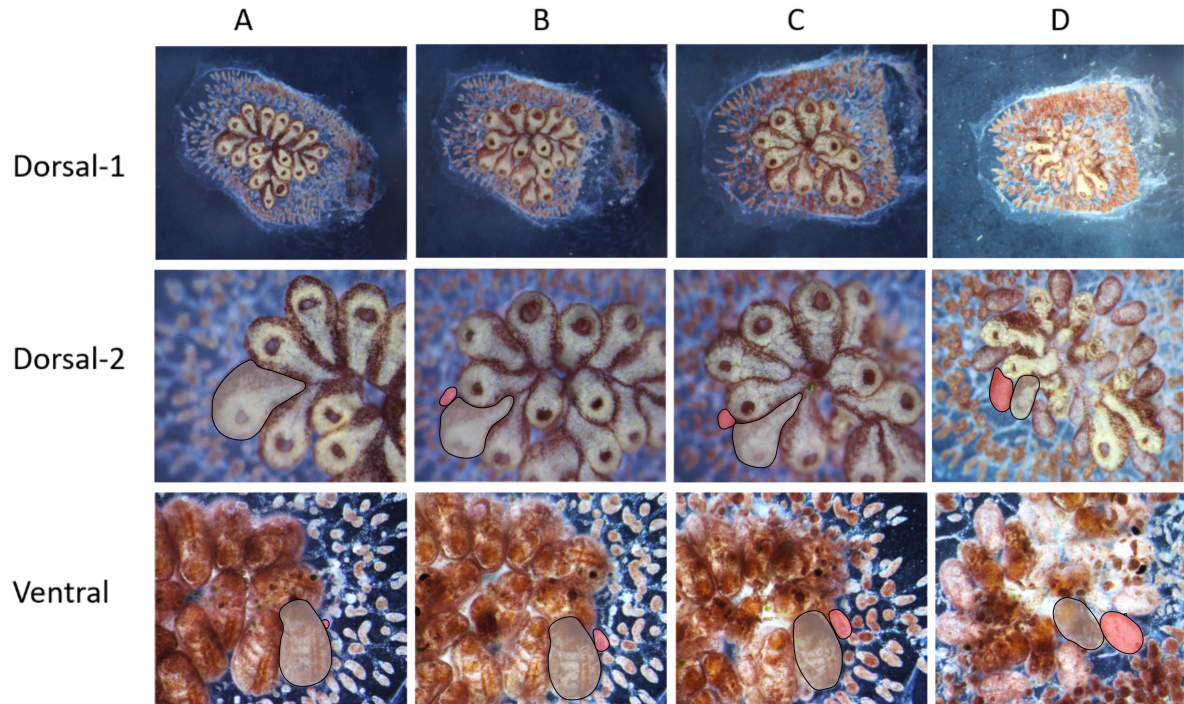

**Figure S3. The blastogenic cycle of *B. niger*.** The cycle was monitored on a daily basis, both from the dorsal and the ventral side of the colony. The letters above each column indicate the corresponding blastogenic stage. New parental zooids are growing new primary buds in the stage A. These new buds are increasing in size and developing secondary buds at stage B and further in stage C. The parental zooids are absorbed at stage D and the primary zooids are replacing them as the new parental zooids in the stage A of the upcoming cycle. The outline of a zooid (grey), of one of its primary bud (pink) and of one of its secondary bud (green) are depicted.

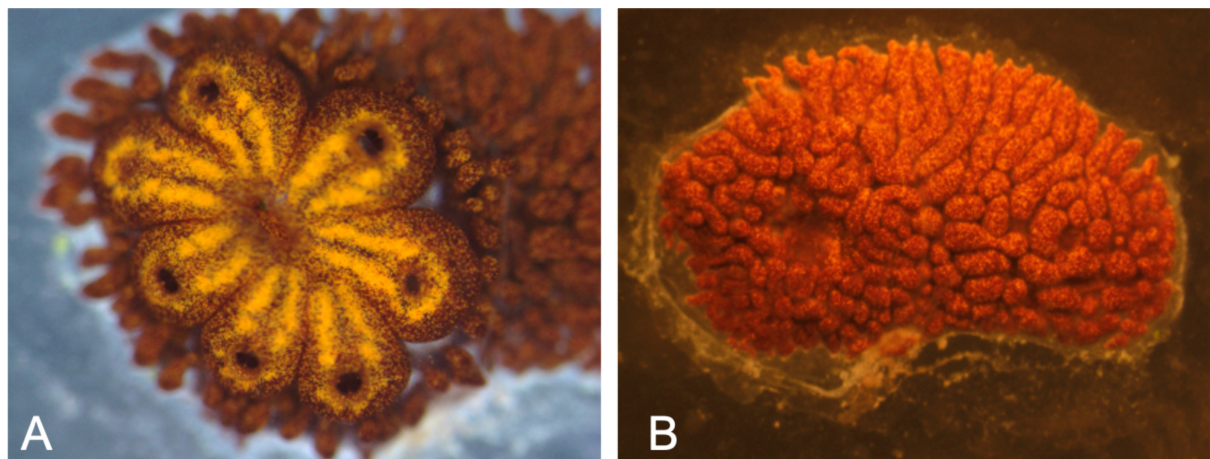

**Figure S4. Hibernation of *B. niger*.** **A)** A common *B. niger* morph during the active filter feeding phase. Seven zooids are visible with their siphons open. **B)** The same colony during hibernation. No zooid is present, only a dense mat of highly pigmented ampullae are visible inside the tunic.





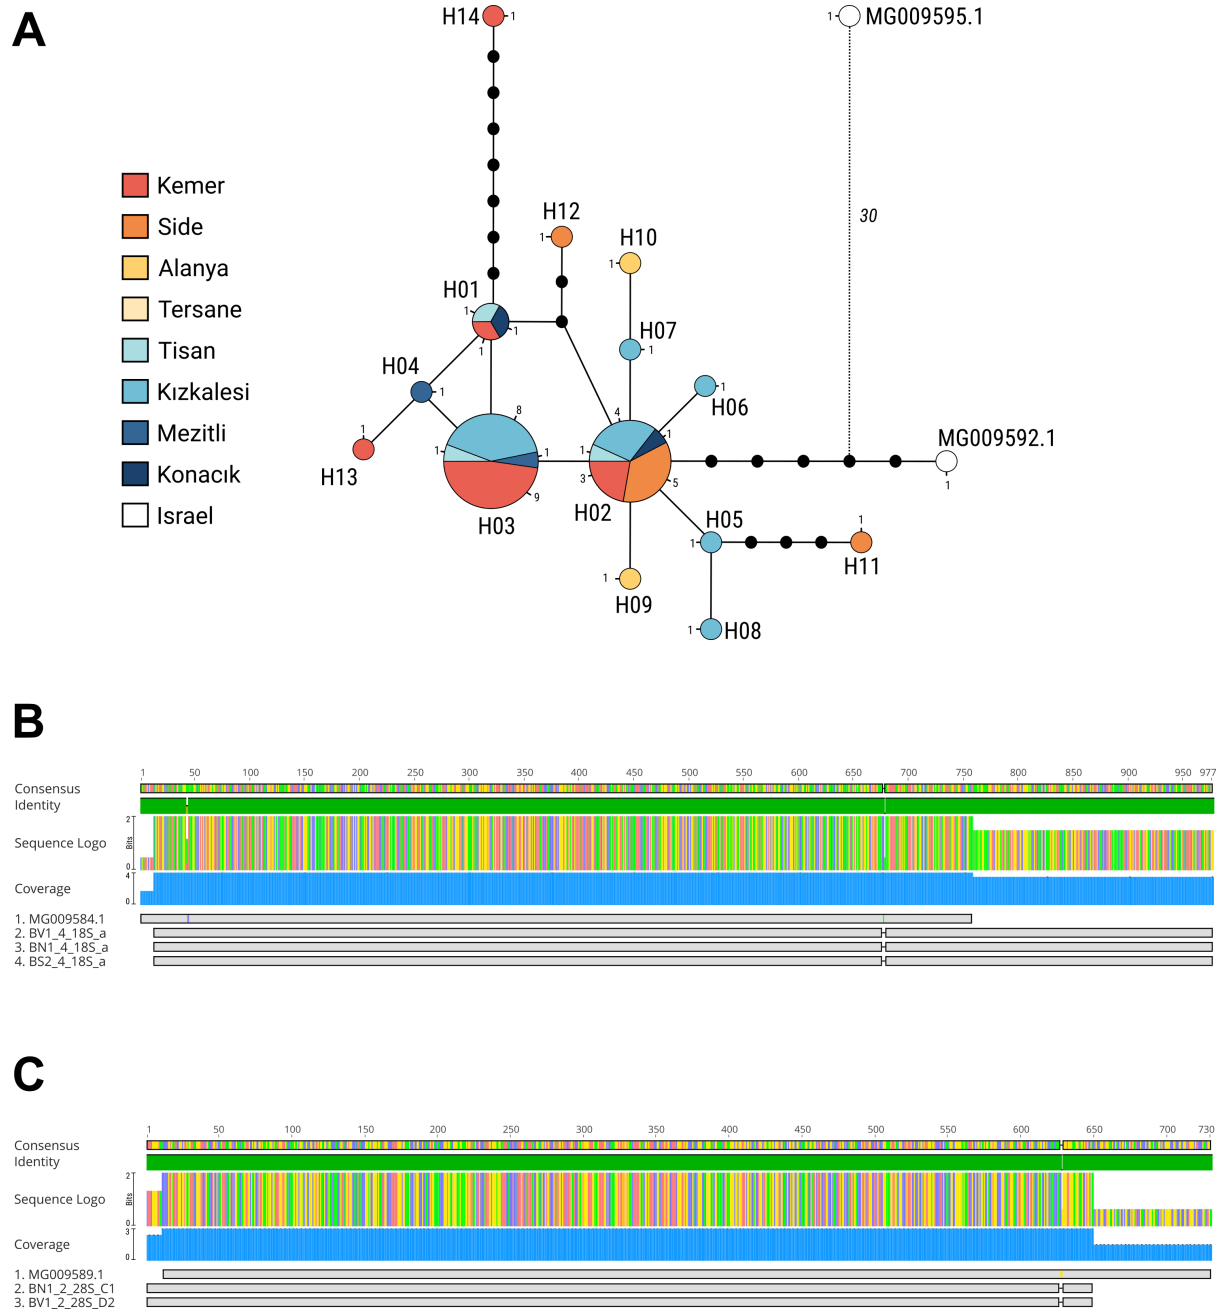

**Figure S6. Nuclear gene analyses of *B. niger*.** **A)** Median Joining Network estimation of *B. niger* based on H3 locus, overlaid with the corresponding haplotype name. Database samples: MG009592.1 - *Botrylloides leachii* - Israel; MG009595.1 - *Botryllus schlosseri* - Israel. Size differences of circles indicate frequency while colours reflect regions where the colony was sampled. Numbers represent the number of samples in each category, and each correcting edge a distance of one mutation steps between the haplotypes, with the exception of the dotted line which summarizes 30 mutations. **B)** *B. niger* 18S multiple sequences alignment profile, MG009584.1 - *Botrylloides aff. leachii* - Israel. **C)** *B. niger* 28S multiple sequences alignment profile, MG009589.1 - *Botrylloides aff. leachii* - Israel.



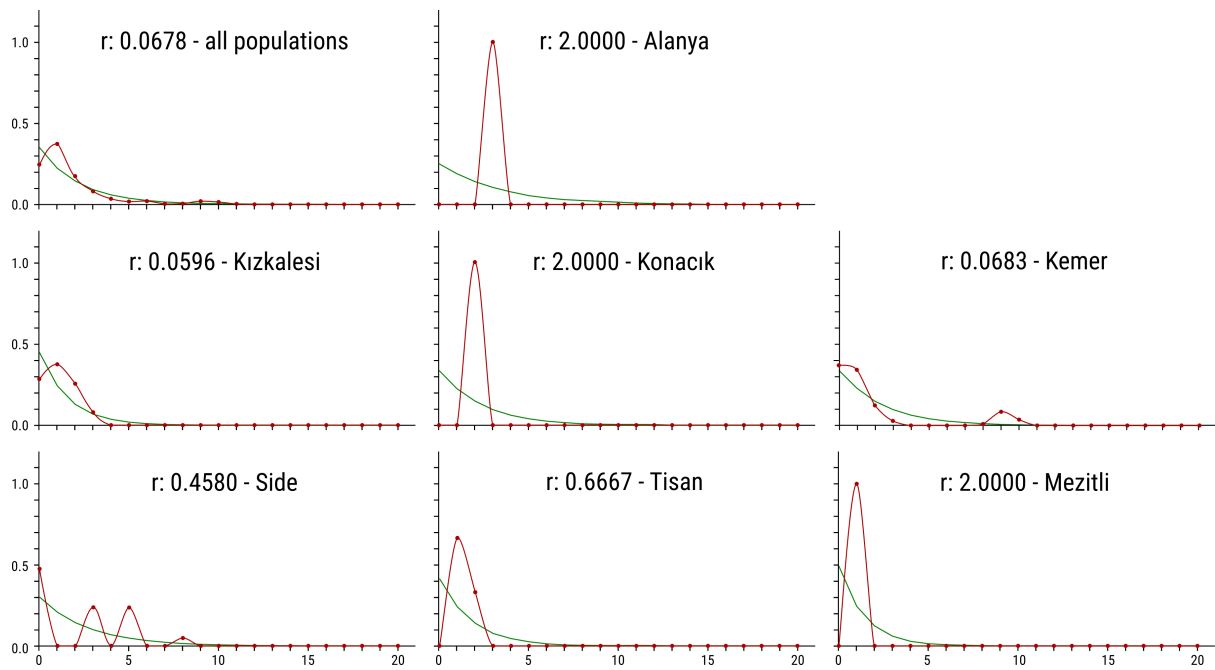

**Figure S7. Population size changes analysis based on the mismatch distribution of the COI gene for Kızkalesi, Mezitli, Konacık, and all populations.** Raggedness statistic values ( $r$ ) for each analysis was supplied ( $r > 0.05$ ). The X-axis is the number of pairwise differences while the Y-axis represents frequency. The red line indicates the observed frequency, and the green line the expected frequency for a stable population.

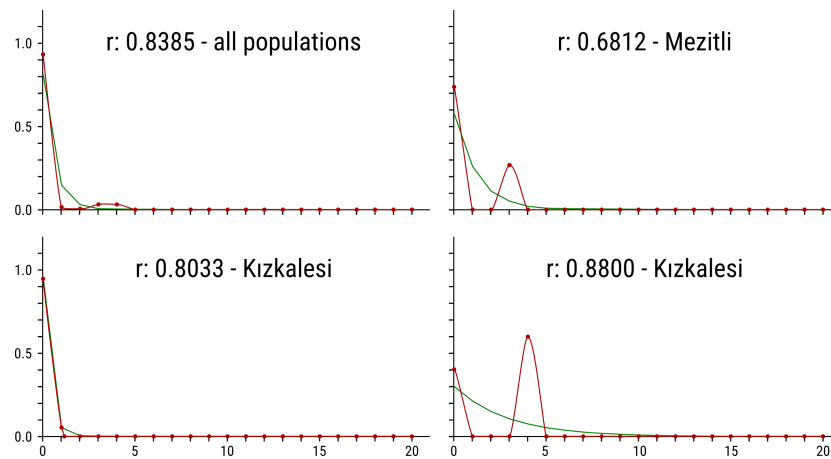

**Figure S8. Population size changes of Kızkalesi time-series station based on mismatch distribution of COI.** Raggedness statistic values ( $r$ ) for each analysis was supplied ( $r > 0.05$ ). The X-axis is the number of pairwise differences while the Y-axis represents frequency. The red line indicates the observed frequency, and the green line the expected frequency for a stable population.
